# Supplementary material
Source: PubMed Central journal article supplement (PMC4001183)

## AAN Sports Neurology Survey

### Current Issues in Sports Neurology

1. Prior to this survey, did you know that the AAN had a Sports Neurology Section?

- Yes
                 
  No

2. In your opinion, how important is it to address the following issues currently facing sports concussion management?

|                                                                                                                                           | <i>Very<br/>important</i> | <i>Moderately<br/>important</i> | <i>Somewhat<br/>important</i> | <i>Not<br/>important</i> | <i>Don't<br/>know</i> |
|-------------------------------------------------------------------------------------------------------------------------------------------|---------------------------|---------------------------------|-------------------------------|--------------------------|-----------------------|
| Developing objective diagnostic criteria for concussion                                                                                   | <input type="radio"/>     | <input type="radio"/>           | <input type="radio"/>         | <input type="radio"/>    | <input type="radio"/> |
| Developing evidence-based return-to-play guidelines                                                                                       | <input type="radio"/>     | <input type="radio"/>           | <input type="radio"/>         | <input type="radio"/>    | <input type="radio"/> |
| Developing indications for use and validation of supplemental testing (computerized neuropsychological tests) in management of concussion | <input type="radio"/>     | <input type="radio"/>           | <input type="radio"/>         | <input type="radio"/>    | <input type="radio"/> |
| Identifying risk factors for long-term cognitive-behavioral sequelae                                                                      | <input type="radio"/>     | <input type="radio"/>           | <input type="radio"/>         | <input type="radio"/>    | <input type="radio"/> |
| Obtaining clinical data for high school and younger athletes                                                                              | <input type="radio"/>     | <input type="radio"/>           | <input type="radio"/>         | <input type="radio"/>    | <input type="radio"/> |
| Delineating the role and significance of subconcussive injuries                                                                           | <input type="radio"/>     | <input type="radio"/>           | <input type="radio"/>         | <input type="radio"/>    | <input type="radio"/> |
| Other (please specify): _____                                                                                                             | <input type="radio"/>     | <input type="radio"/>           | <input type="radio"/>         | <input type="radio"/>    | <input type="radio"/> |

3. Which specialist do you think is best qualified to manage sports concussion? *Mark one answer.*

- |                                          |                                                                       |
|------------------------------------------|-----------------------------------------------------------------------|
| <input type="radio"/> Athletic trainers  | <input type="radio"/> Neurosurgeons                                   |
| <input type="radio"/> Chiropractors      | <input type="radio"/> Psychiatrists                                   |
| <input type="radio"/> Neurologists       | <input type="radio"/> Sports medicine trained primary care physicians |
| <input type="radio"/> Neuropsychologists | <input type="radio"/> Other (please specify): _____                   |

4. What is your current practice (or what would be your choice) if an athlete is suspected of having suffered a concussion? *Mark one answer.*

- He/she should be allowed back in the game  
 He/she should be allowed back in the game if symptoms clear within 15 minutes  
 He/she should not be allowed back in the game  
 Not sure

### Your Practice and Experience

5. What type of formal or informal training did you receive in sports concussions/sports neurology? *Mark all that apply.*

- |                                                                                |                                                              |
|--------------------------------------------------------------------------------|--------------------------------------------------------------|
| <input type="radio"/> Experience before medical school (e.g. athletic trainer) | <input type="radio"/> Residency - lectures                   |
| <input type="radio"/> Medical school - formal training/rotations               | <input type="radio"/> Fellowship - sports medicine/neurology |
| <input type="radio"/> Medical school - lectures                                | <input type="radio"/> None of the above                      |
| <input type="radio"/> Residency - formal training/rotations                    |                                                              |

|  |  |  |  |  |  |
|--|--|--|--|--|--|
|  |  |  |  |  |  |
|--|--|--|--|--|--|

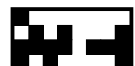

## AAN Sports Neurology Survey

**6. What percent of all patients you see in your practice have sports-related neurological issues?**

- 0% - Skip to Question 13   
  1-10%   
  11-25%   
  26-50%   
  >50%

**7. Of all sports-related neurological issues you treat, what percent does each condition represent? *Total number should add up to 100%.***

|                      |                      |                      |                                                                                     |
|----------------------|----------------------|----------------------|-------------------------------------------------------------------------------------|
| <input type="text"/> | <input type="text"/> | <input type="text"/> | Pre-existing neurological conditions requesting permission to participate in sports |
| <input type="text"/> | <input type="text"/> | <input type="text"/> | Peripheral nerve injuries                                                           |
| <input type="text"/> | <input type="text"/> | <input type="text"/> | Sports concussion                                                                   |
| <input type="text"/> | <input type="text"/> | <input type="text"/> | Spine injuries                                                                      |
| <input type="text"/> | <input type="text"/> | <input type="text"/> | Other (please specify): _____                                                       |
| <b>100%</b>          |                      |                      |                                                                                     |

**8. Which guidelines do you use when considering returning an athlete to play? *Mark all that apply.***

- AAN Position Statement on Sports Concussion (2010)  
 AAN Sports Concussion Guideline (1997)  
 American Academy of Pediatrics Concussion Guidelines (2010)  
 Consensus Statement on Concussion in Sport - Zurich, November 2008  
 I do not follow any specific guidelines  
 I do not see concussed athletes  
 Other (please specify): \_\_\_\_\_

**9. Which sources do you use to stay current with sports-related neurological issues? *Mark all that apply.***

- Lectures/workshops at AAN meetings  
 Lectures/workshops at other meetings (please specify): \_\_\_\_\_  
 Medical journals  
 Web-based sources (includes Sports Neurology Section listserv)  
 Other (please specify): \_\_\_\_\_

**10. Are you currently formally affiliated with a sports team?**

- Yes                     
  No - Skip to Question 13

**11. What is the level of your team affiliation? *Mark all that apply.***

- High school or amateur     
  College                     
  Professional

**12. Which sport is your team affiliated with? *Mark all that apply.***

- |                                    |                                                |                                                     |
|------------------------------------|------------------------------------------------|-----------------------------------------------------|
| <input type="radio"/> Basketball   | <input type="radio"/> Ice hockey               | <input type="radio"/> Volleyball                    |
| <input type="radio"/> Boxing       | <input type="radio"/> Lacrosse                 | <input type="radio"/> Wrestling                     |
| <input type="radio"/> Cheerleading | <input type="radio"/> Mixed martial arts (MMA) | <input type="radio"/> Other (please specify): _____ |
| <input type="radio"/> Field hockey | <input type="radio"/> Soccer                   |                                                     |
| <input type="radio"/> Football     | <input type="radio"/> Softball                 |                                                     |

|  |  |  |  |  |  |  |
|--|--|--|--|--|--|--|
|  |  |  |  |  |  |  |
|--|--|--|--|--|--|--|

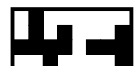

## AAN Sports Neurology Survey

### Future Education on Sports Neurology

13. Would you like to see more sports neurology-related educational programs offered by the AAN?

- Yes                       No - Skip to Question 15

14. Which of the following topics would you be interested in? Rank from 1 to 7, with 1 = most interested and 7 = least interested.

- Evaluation of the patient with pre-existing neurological conditions who desires to participate in sports
- Sports concussion
- Spine injuries
- Peripheral nerve injury
- Recent onset seizure/syncope
- Use of sports/exercise to enhance neurological/cognitive function
- Other (please specify): \_\_\_\_\_

15. Would you be interested in CME courses on sports concussion and sports-related neurological issues?

- Yes                       No - Skip to Question 17

16. What is your preferred format for CME courses? *Mark all that apply.*

- AAN Annual Meeting
- AAN-sponsored event separate from the AAN meeting (e.g. fall conference)
- Web-based courses

17. Please add any other comments you may have regarding the topic of this survey:

---

---

---

---

Thank you for your participation.  
Please FAX the survey to (612) 454-2745  
or mail it back to the AAN

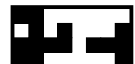

Supplement: supp_01.CPJ.0000437697.63630.71_Appendix_e-1.pdf [file supp_01.CPJ.0000437697.63630.71_Appendix_e-1.pdf]
